# Supplementary material for: 4. Les petits-maîtres et le cinéma du samedi soir: Marc Allegret - Henri Decoin - René Clair.
Source: MDPI journal article supplement (doi:10.3390/antiox13080892), 2012-01-01
Supplement: s1 [file s1]

Table S1 Primers used in qRT-PCR

| Name           | Primer sequence (5'-3')     | Tm (°C) | Product length |
|----------------|-----------------------------|---------|----------------|
| claudin-1      | F-CCTGCTGTGCTGCTCCTGTC      | 61.6    | 75bp           |
|                | R-GAAGGTGCTGGCTTGGGATAGG    | 61.4    |                |
| occludin       | F-CGAGAAGCGACCGTATCCAGAG    | 61.4    | 129bp          |
|                | R-TCCAAGTTACCACTGCTGCTGTAG  | 59.6    |                |
| muc-2          | F-ACGACTCCTACGCCCTCCTG      | 61.6    | 130bp          |
|                | R-ACGCTGCCATCCGACTTGAAG     | 59.5    |                |
| ZO-1           | F-GGGCAAGTTAAAGATGGTGGTTCAG | 59.6    | 93bp           |
|                | R-GAGGCGTCAGCAGAGTGGATG     | 61.5    |                |
| TNF- $\alpha$  | F-ACGGCGTGGAGCTGAAAGAC      | 59.5    | 79bp           |
|                | R-CTGAAGAGGACCTGCGAGTAGATG  | 61.3    |                |
| IL-6           | F-TCTAATAACCACTCCAGCCACACAC | 59.6    | 77bp           |
|                | R-TTGC GTTCTTTACCCACTCGTTTG | 57.9    |                |
| IL-1 $\beta$   | F-GGCAGGCAGTGTCGGTCATC      | 61.6    | 83bp           |
|                | R-CCTCAGGTCATCATCACGGAAGAC  | 61.3    |                |
| IL-10          | F-AATGAAGGACCAACTGAACAGCATG | 57.9    | 87bp           |
|                | R-TCCGACAAGGCTTGGCAACC      | 59.5    |                |
| $\beta$ -Actin | F-AGCAAGCGTGGCATCCTAACC     | 59.5    | 77bp           |
|                | R-ATCTTCTCCATGTCGTCCCAGTTG  | 59.6    |                |
